# Supplementary material for: Prevention of Testicular Damage by Indole Derivative MMINA via Upregulated StAR and CatSper Channels with Coincident Suppression of Oxidative Stress and Inflammation: In Silico and In Vivo Validation
Source: MDPI journal article supplement (doi:10.3390/antiox11102063), 2022-10-19

**Supplementary File: S3**

**Title: Prevention of testicular damage by indole derivative MMINA via upregulated StAR and CatSper channels with coincident suppression of oxidative stress and inflammation: *In silico* and *in Vivo* validation**

Tayyaba Afsar<sup>1</sup>, Suhail Razak<sup>1\*</sup>, Janeen H. Trembley<sup>2,3,4</sup>, Khushbukhat Khan<sup>5</sup>, Maria Shabbir<sup>5</sup>, Ali Almajwal<sup>1</sup>, Nawaf W. Alruwaili<sup>1</sup>, Muhammad Umar Ijaz<sup>5</sup>

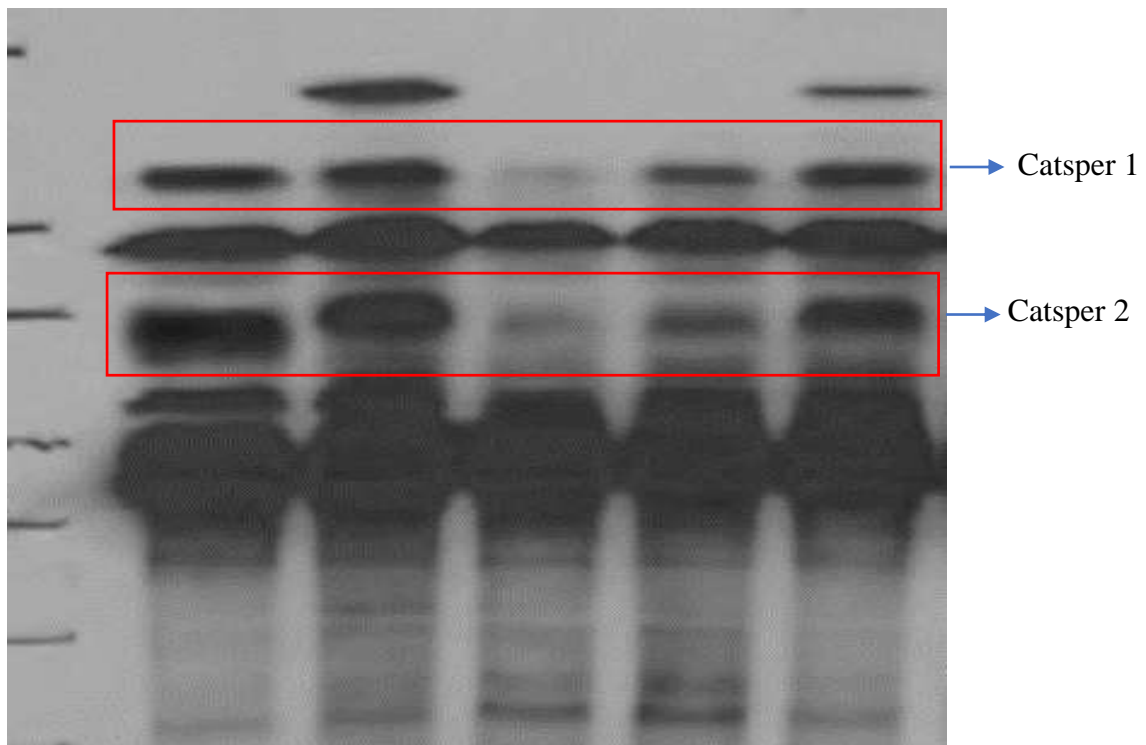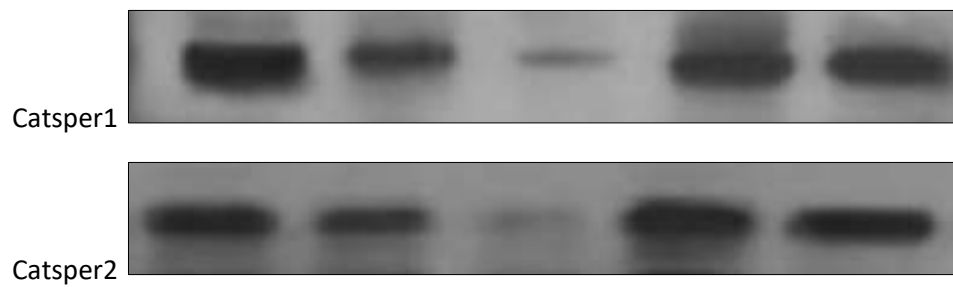

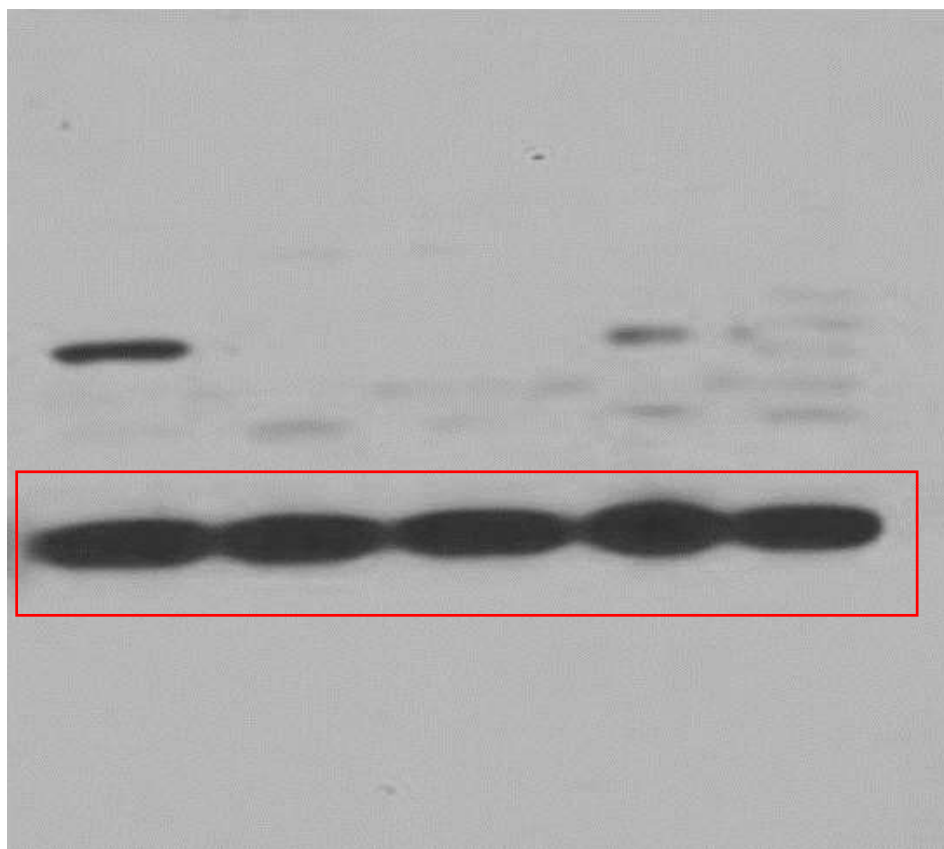

→ β actin

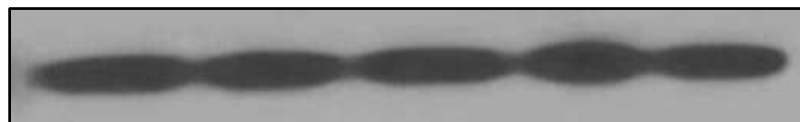

β actin

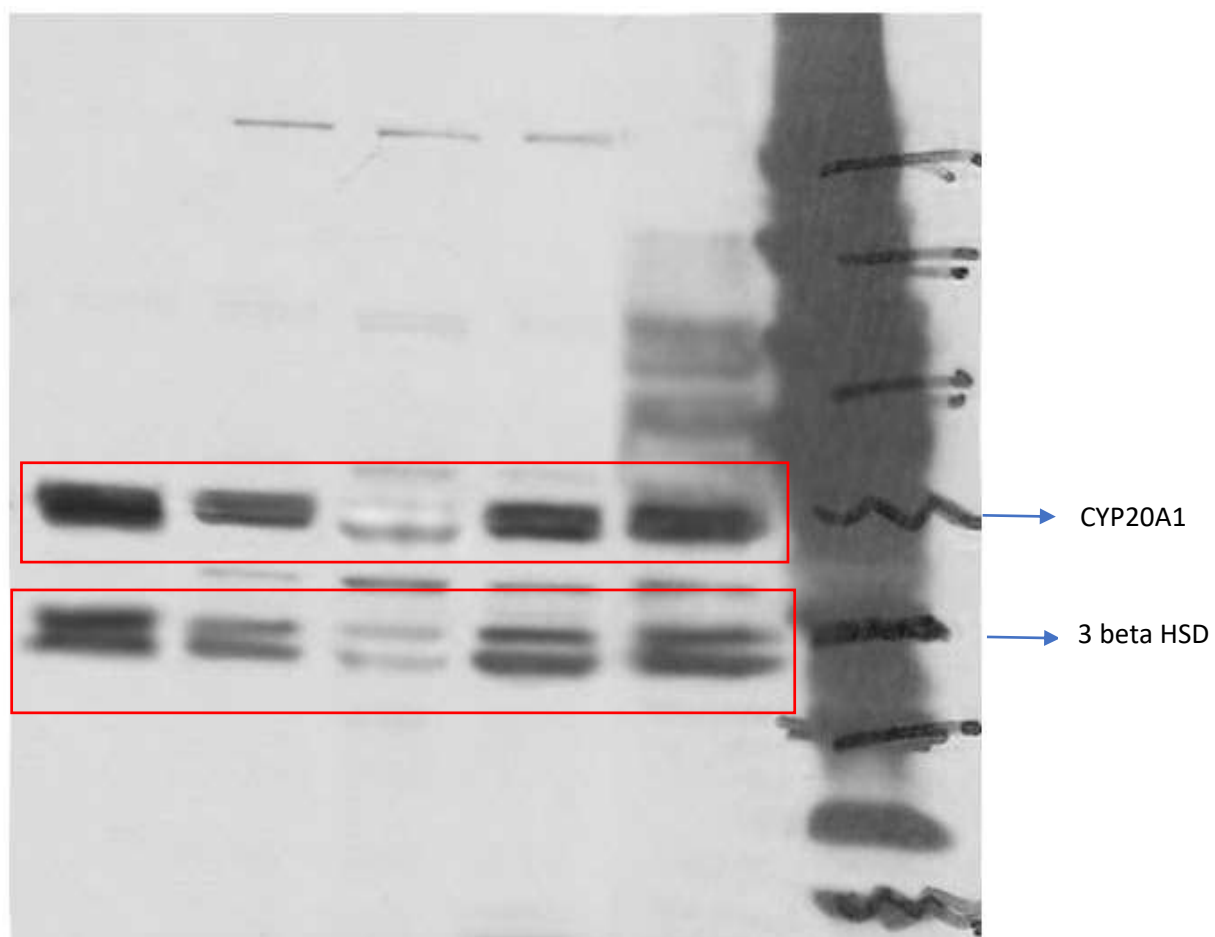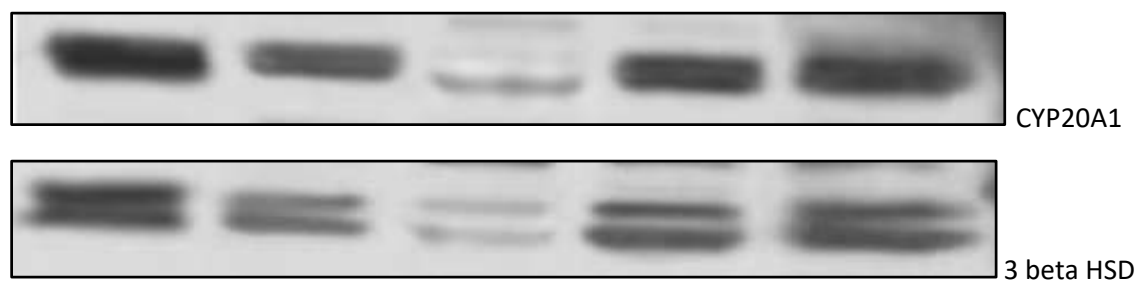

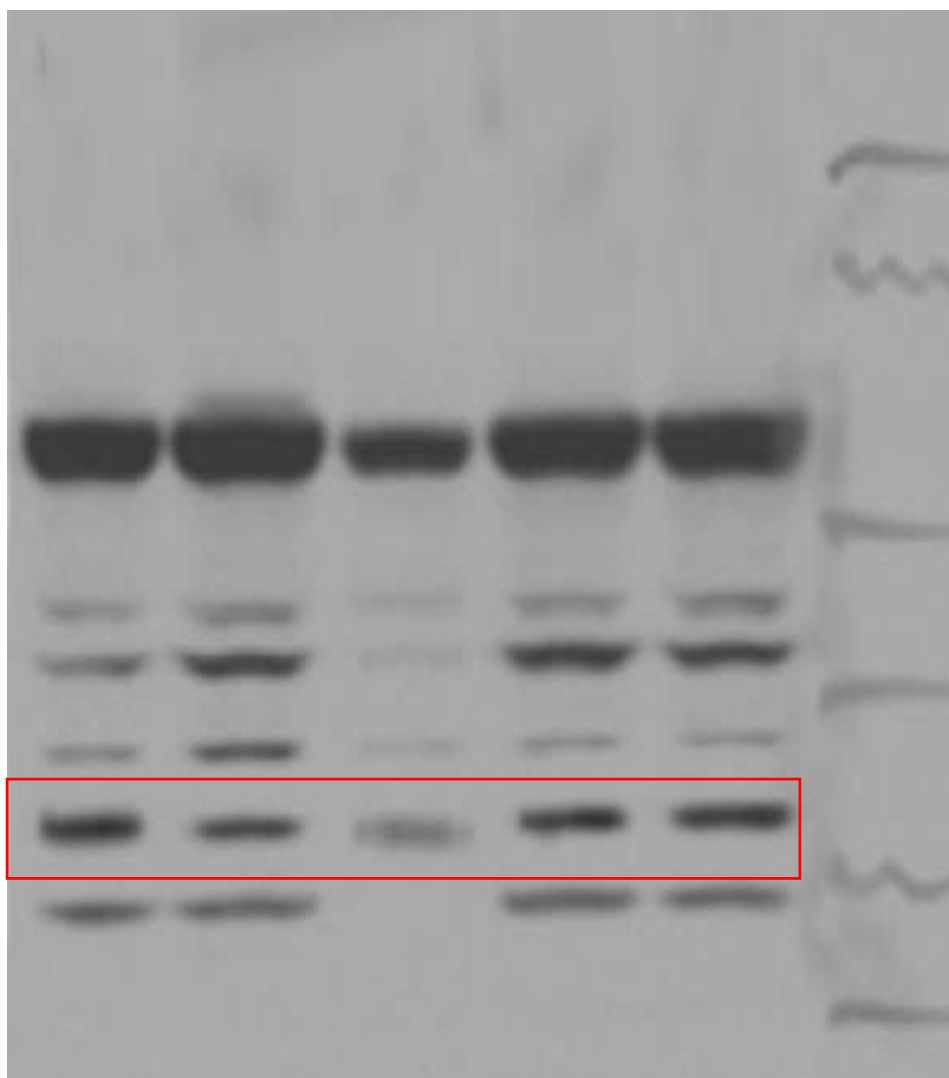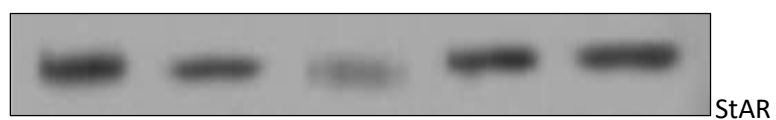

\

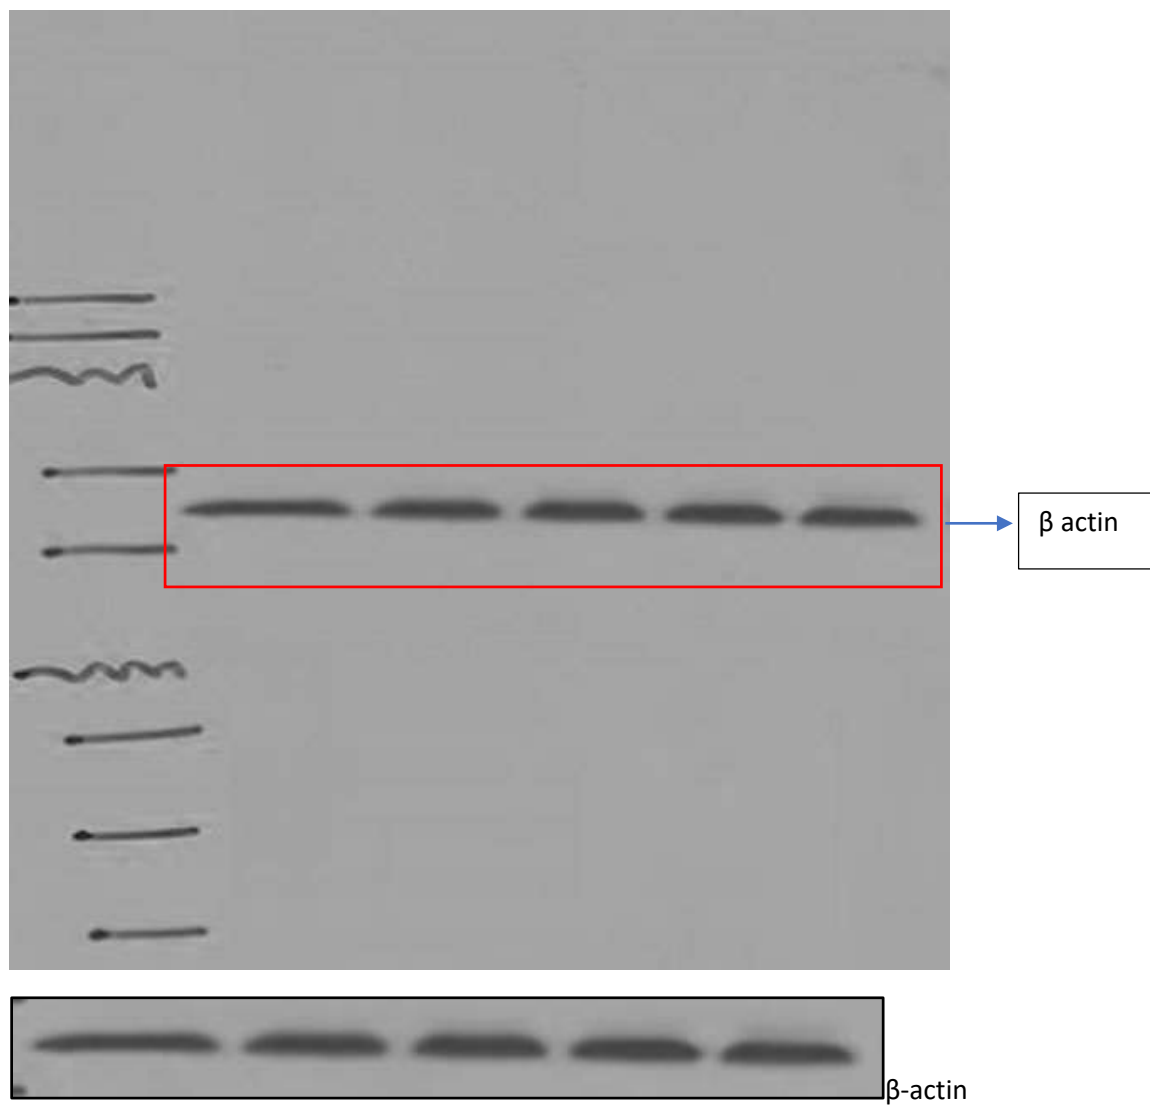

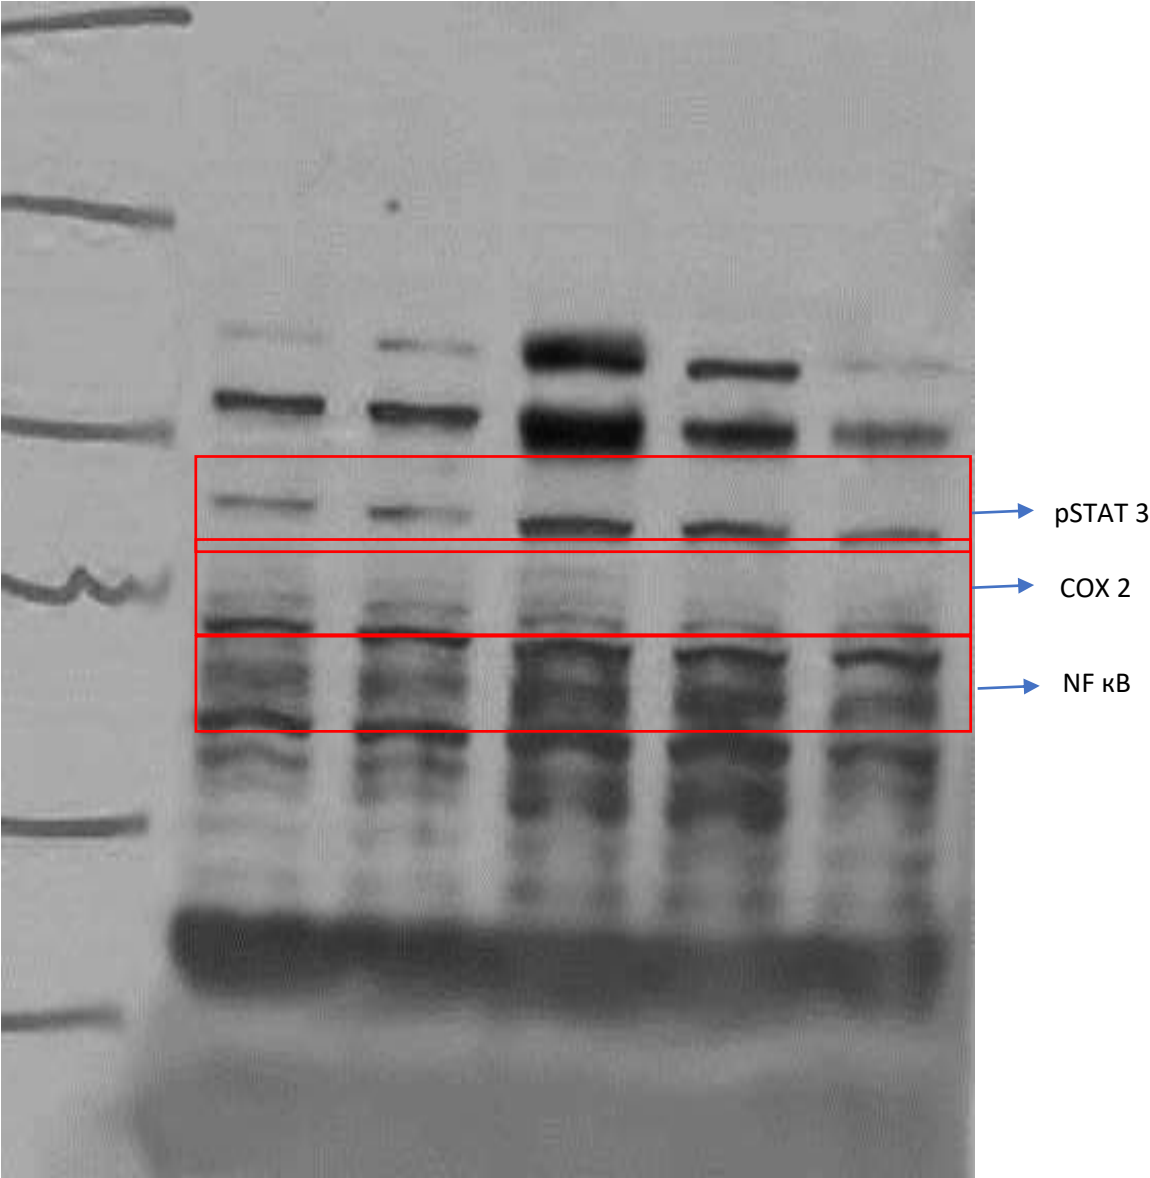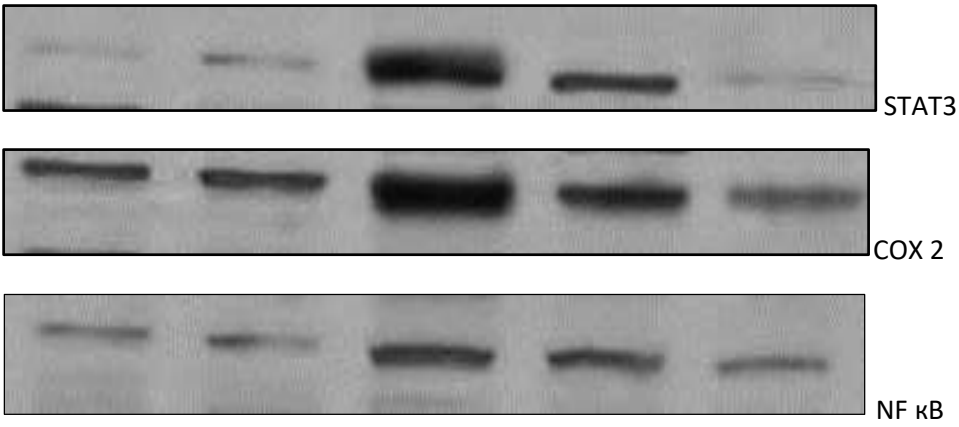

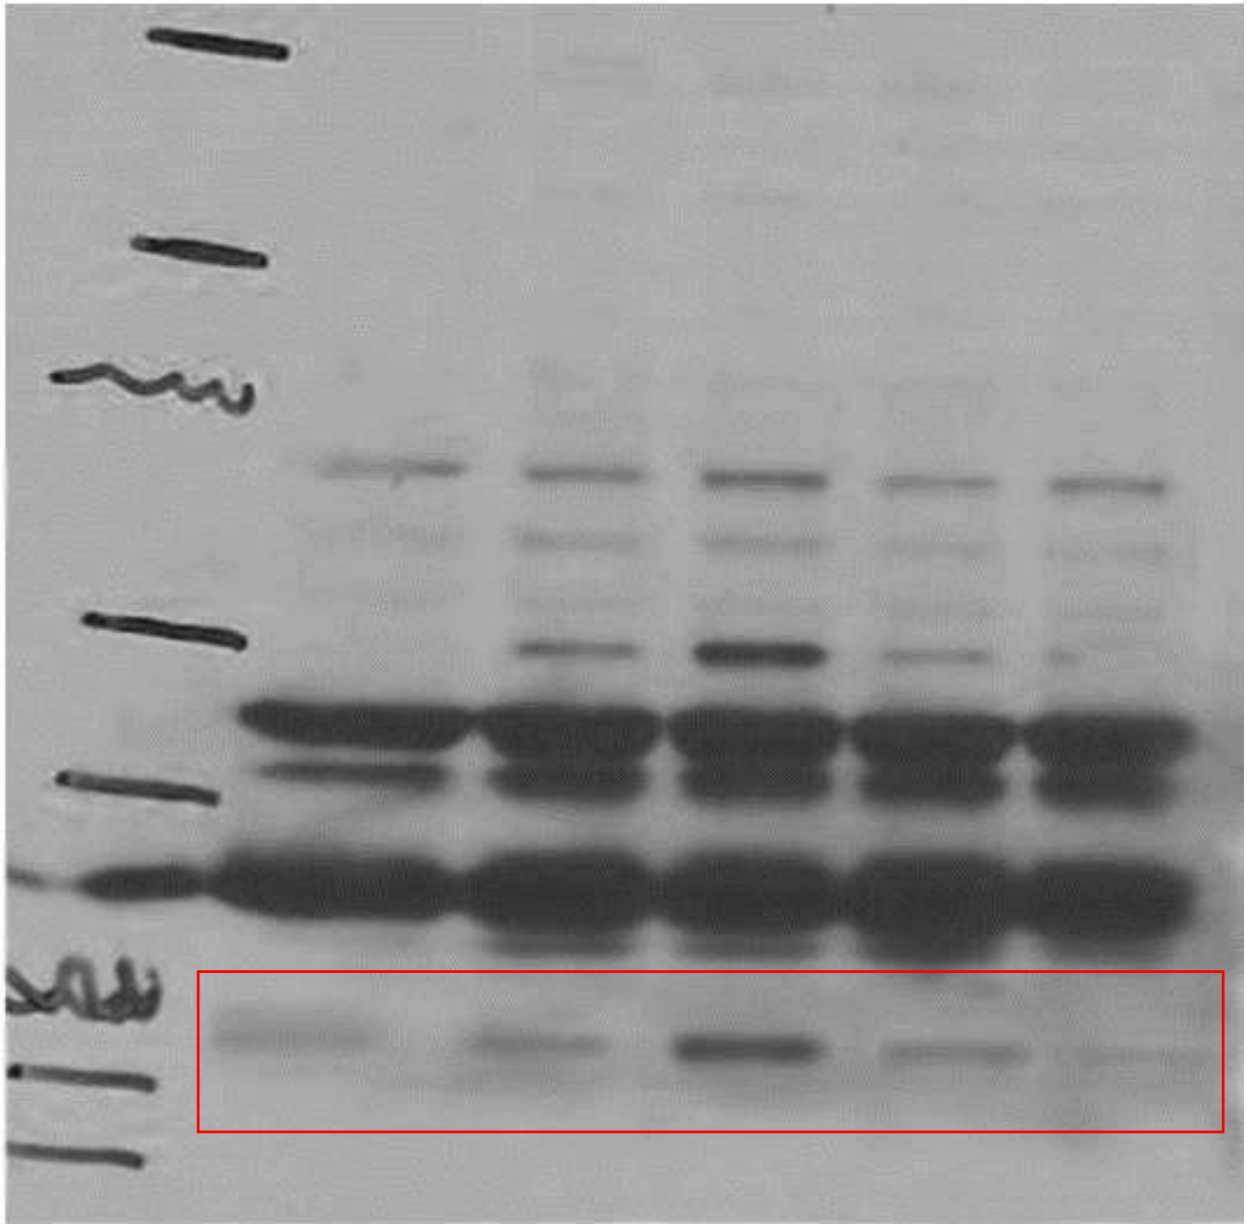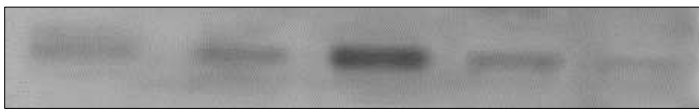

TNF alpha

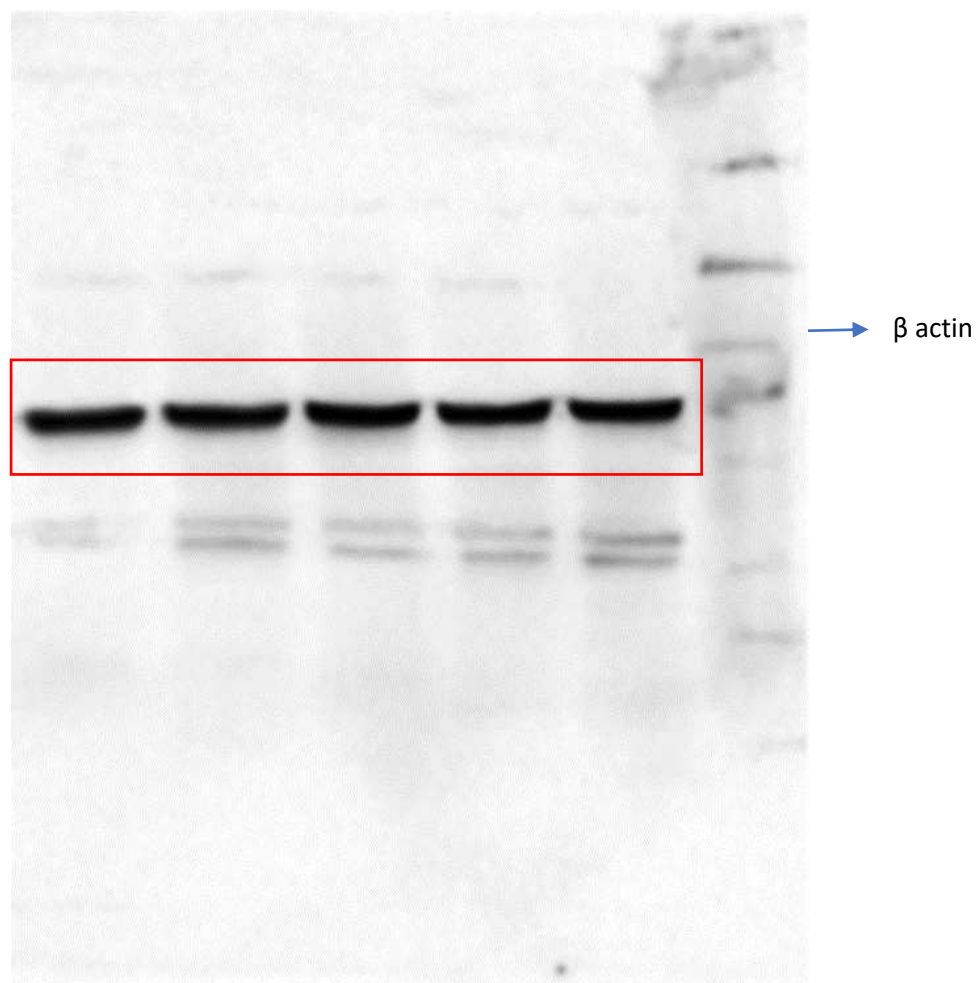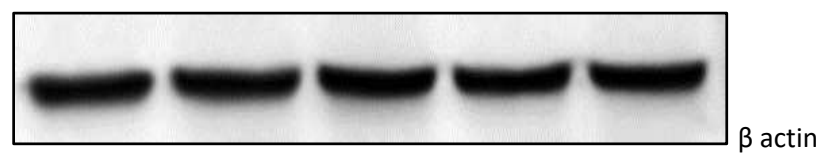



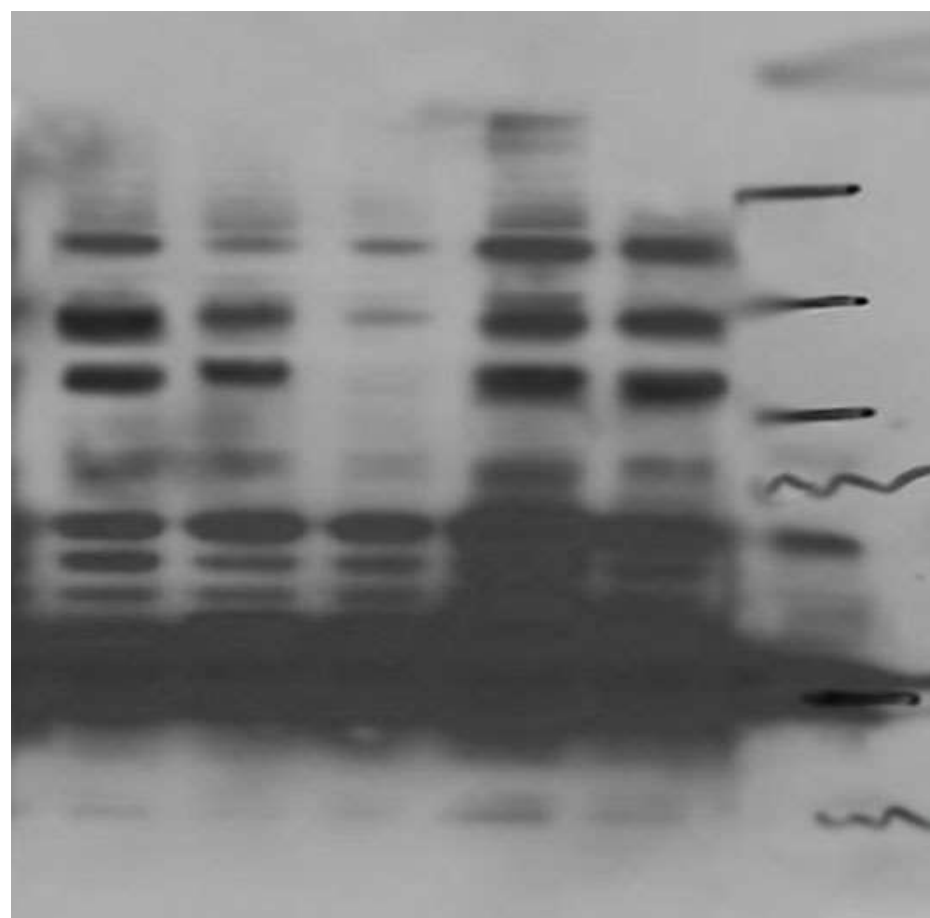

Supplement: s1 [file s1]
