# Supplementary material for: Prevention of Testicular Damage by Indole Derivative MMINA via Upregulated StAR and CatSper Channels with Coincident Suppression of Oxidative Stress and Inflammation: In Silico and In Vivo Validation
Source: MDPI journal article supplement (doi:10.3390/antiox11102063), 2022-10-19
Supplement: s1 [file s1]

**Supplementary File: S4**

**Title: Prevention of testicular damage by indole derivative MMINA via upregulated StAR and CatSper channels with coincident suppression of oxidative stress and inflammation: *In silico* and *in Vivo* validation**

Tayyaba Afsar<sup>1</sup>, Suhail Razak<sup>1\*</sup>, Janeen H. Trembley<sup>2,3,4</sup>, Khushbukhat Khan<sup>5</sup>, Maria Shabbir<sup>5</sup>, Ali Almajwal<sup>1</sup>, Nawaf W. Alruwaili<sup>1</sup>, Muhammad Umar Ijaz<sup>5</sup>

**Supplementary Table 2: Docked complexes of inflammatory pathway proteins with MMINA along with vina score and cavity size**

| Drug  | Protein   | Vina score | Cavity size |
|-------|-----------|------------|-------------|
| MMINA | COX3      | -9.1       | 1312        |
|       |           | -8.9       | 4932        |
|       |           | -7.4       | 994         |
|       |           | -7.4       | 196         |
|       |           | -6.5       | 224         |
|       | TNF alpha | -7.6       | 303         |
|       |           | -7.1       | 59          |
|       |           | -7         | 92          |
|       |           | -6.3       | 53          |
|       |           | -6.1       | 66          |
|       | NF-kB     | -7.3       | 219         |
|       |           | -6.9       | 362         |
|       |           | -6.7       | 305         |
|       |           | -6.5       | 692         |
|       |           | -4.9       | 164         |
|       | STAT3     | -8.6       | 504         |
|       |           | -7.9       | 3885        |
|       |           | -7.7       | 1286        |
|       |           | -7.2       | 2161        |
|       |           | -5.9       | 510         |

**Supplementary Table 3: Docked complexes of testicular function proteins with MMINA along with vina score and cavity size**

| Drug  | Protein   | Vina score | Cavity size |
|-------|-----------|------------|-------------|
| MMINA | 3beta HSD | -9.6       | 3266        |

|  |          |      |       |
|--|----------|------|-------|
|  |          | -7.4 | 289   |
|  |          | -6.8 | 264   |
|  |          | -6.6 | 194   |
|  |          | -5.7 | 211   |
|  | CATSPERZ | -7.7 | 272   |
|  |          | -7.1 | 97    |
|  |          | -6.6 | 101   |
|  |          | -6.6 | 95    |
|  |          | -6.3 | 92    |
|  | CYP20A1  | -7.6 | 469   |
|  |          | -7.5 | 14045 |
|  |          | -7.3 | 215   |
|  |          | -7.1 | 674   |
|  |          | -7   | 338   |
|  | StAR     | -9   | 1425  |
|  |          | -7.3 | 112   |
|  |          | -7.2 | 429   |
|  |          | -7   | 300   |
|  |          | -6.7 | 162   |
