# Supplementary material for: Prevention of Testicular Damage by Indole Derivative MMINA via Upregulated StAR and CatSper Channels with Coincident Suppression of Oxidative Stress and Inflammation: In Silico and In Vivo Validation
Source: Antioxidants (Basel). 2022 Oct 19;11(10):2063. doi: 10.3390/antiox11102063 (PMC9598787; doi:10.3390/antiox11102063)
Supplement: Supplementary file 1 [file antioxidants-11-02063-s001.zip]

Archive with 4 entries (4 files):
- Supplementary File S1.pdf
- suplimentary 2.pdf
- Supplimentary file 3 western bloting.pdf
- Supplimentary file 4.docx.pdf
